# Supplementary material for: Unilateral pulmonary edema after minimally-invasive bentall procedure - Case report
Source: PubMed Central journal article supplement — Heliyon. 2024 Apr 20;10(9):e29911. doi: 10.1016/j.heliyon.2024.e29911 (PMC11066307; doi:10.1016/j.heliyon.2024.e29911), 2024-04-20
Supplement: mmc1.pdf [file mmc1.pdf]

Dear donor;

This informed consent form is to ask for your consent to collect and preserve health-related information (hereinafter referred to as "information") and biological samples (such as blood, pleural fluid, cells, surgical resection materials, urine, feces, sputum, etc.) generated during or after your visit to our hospital (including outpatient, inpatient, emergency, follow-up, etc.), which may be used for medical teaching and research in the future. The information and samples will be stored at Zhongshan Hospital, Fudan University (hereinafter referred to as Zhongshan Hospital). Therefore, please make sure to carefully read the following content in order for you to make a decision. This decision is entirely your own choice. When the representative of Zhongshan Hospital (your supervising doctor or designated personnel of the hospital) and you discuss the informed consent form, you can ask him/her to explain to you any areas you do not understand.

1、 The purpose and significance of collecting information and samples

Collecting and storing information and samples from your hospitalization period for future medical teaching and research can help improve the prevention and treatment of related diseases, potentially helping all populations, including you, promote medical development and improve people's health levels.

2、 The purpose of information and samples

Information and sample collection are public welfare, non-profit, and do not further charge. Your information and samples may be used for teaching and research on the occurrence and development mechanisms of various diseases in the future, including genetics, until the samples are used up or you withdraw your informed consent. The preservation of samples for teaching and research will be long-term, and the exact preservation time cannot be accurately estimated at present. Information and samples may be provided for use by institutions outside of Zhongshan Hospital, and any use must go through strict review procedures by the Ethics Committee of Zhongshan Hospital to protect your rights, ensure the rationality and feasibility of scientific research, and comply with ethical and legal norms.

3、 Possible risks

The collection of samples will not cause you any additional discomfort. Blood and other body fluid samples are carried out simultaneously with the collection of necessary examinations for diagnosis and treatment. Principally, you need to donate about 10 ml blood samples in addition to the amount required for routine examinations. The prerequisite for collecting tissue samples is that diagnosis and treatment must be performed through resection or biopsy, which is carried out after the specimen is detached and fully meets the needs of pathological diagnosis. The collection of all samples will not affect your clinical diagnosis and treatment results or increase your health risks.

4、 Expected benefits

Donating samples means that you will not receive any economic benefits, including direct economic compensation and reduction of medical expenses. Due to the current lack of possible research results, it is highly likely that you will not receive any medical benefits from the research results. Nevertheless, the results of future research may be benefit to you and other patients with similar diseases. If any patent rights or commercial interests are derived from the research results, all rights and interests will be unrelated to you.

5、 Refusal and return of consent

You have the right to decline the consent form. Refusing to sign this informed consent form will not affect your rights, and you will not be discriminated against or treated differently. After donation, you can withdraw your consent at any time without providing a reason. If you wish to revoke the right to use the information and samples, please contact the staff who informed you of the information or the sample

library staff of Zhongshan Hospital (phone number: 021-64041990). By then, you will sign a declaration of revoke. Any remaining samples and information will be destroyed immediately.

#### 6、 Measures to safeguard personal privacy

We will protect your personal privacy within the scope of legal provisions. The samples and information you donate will be anonymized, and users will not be able to access your personal data. The research data may be publicly available, but your name or identifiable personal information will not be disclosed.

#### 7、 The potential impact of research on specimen providers and their relatives

As it is currently unknown what kind of research your information or sample will be used for, it is also impossible to predict whether the results of the research will have any impact on you, your family, or the population. If there is any significant information related to your and your family's health in the research results, we will respect your choice and decide whether to provide this information to you and/or your family.

Zhongshan Hospital Affiliated to Fudan University

#### Informed consent statement

1. I have read and understood all the contents of this informed consent form.
2. I have opportunities to ask questions, and all questions have been answered.
3. I understand that participating in this activity is entirely voluntary. I can also choose to withdraw from this activity at any time, and my medical benefits and rights will not be affected.
4. I know that signing does not mean exemption from any fees or due diligence.
5. I hope not to know any research results that are significantly related to my health.
6. I am aware that if I have any further questions after signing, I can consult the staff of the Ethics Committee of Zhongshan Hospital (phone: 021-64041990 to 3257).
7. I agree to donate samples and information for future teaching and scientific research, and authorize the Ethics Committee of Zhongshan Hospital Fudan University. The staff will review the appropriateness of using their own samples and information.

(Note: If the donor has no or limited capacity to act, the legal representative's signature and signing date are required.)

#### Zhongshan Hospital informs the informant of the statement

I have accurately explained all the contents of the informed consent form to the donor, answered all the questions they raised, and provided a signed copy of the informed consent form.
