# Supplementary material for: Unilateral pulmonary edema after minimally-invasive bentall procedure - Case report
Source: PubMed Central journal article supplement — Heliyon. 2024 Apr 20;10(9):e29911. doi: 10.1016/j.heliyon.2024.e29911 (PMC11066307; doi:10.1016/j.heliyon.2024.e29911), 2024-04-20
Supplement: mmc2.pdf [file mmc2.pdf]

## 同意发布书

患者或研究参与者同意公布其与以下内容相关的可识别详细信息

手稿标题：

Unilateral Pulmonary Edema after Minimally-Invasive Bentall Procedure - Case Report

Journal: Heliyon

我，以下签名者，同意发布可识别的详细信息，其中可以包括照片和/或视频和/或病例历史和/或在上述期刊上发布的文本（“材料”）中的详细信息和文章。我确认我已经看到并有机会阅读即将出版的材料和文章（如附件）。我已与本文作者胡艳讨论了这份同意书。

我了解期刊都可以印刷版和互联网版提供，并将通过营销渠道和其他第三方提供给更广泛的受众。因此，任何人都可以阅读该杂志上发表的材料。据我了解，读者不仅包括医学专业人士和学术研究人员，还包括记者和普通公众。

患者或研究参与者 郭智明 (请打印)

签字人（姓名） 郭智明 (请打印)

注意：如果患者/研究参与者是未成年人（即不满 18 岁），或无法提供发表知情同意书，则必须由其父母或法定监护人签署。

注意：如果患者/研究参与者已去世，则必须由其近亲签名。

日期 2026.4.17

签署 郭智明

与患者/研究参与者的关系（如果适用）： \_\_\_\_\_

作者姓名 胡艳 郭克芳 史懿

日期 2026.4.17

签署 胡艳 郭克芳 史懿

作者须知：请填写此表格并获得患者或研究参与者的签名并保留一份记录副本。报告患者或研究参与者详细信息的手稿应注明已获得发表同意。您可以酌情使用此模板句子：“从患者/研究参与者/父母/监护人/近亲处获得了发布其详细信息的书面知情同意书”。如果需要，请准备好与期刊编辑部分享该同意发布书。
