# Supplementary material for: Unilateral pulmonary edema after minimally-invasive bentall procedure - Case report
Source: PubMed Central journal article supplement — Heliyon. 2024 Apr 20;10(9):e29911. doi: 10.1016/j.heliyon.2024.e29911 (PMC11066307; doi:10.1016/j.heliyon.2024.e29911), 2024-04-20
Supplement: mmc3.pdf [file mmc3.pdf]

## CONSENT TO PUBLISH FORM

### Patient or study participant consent for publication of their identifiable details in relation to:

Title of manuscript:

\_\_\_\_\_ (“Article”)

Journal:

\_\_\_\_\_ (“Journal”)

I, the undersigned, give my consent for the publication of identifiable details, which can include photograph(s) and/or videos and/or case history and/or details within the text (“Material”) to be published in the above Journal and Article. I confirm that I have seen and been given the opportunity to read both the Material and the Article (as attached) to be published. I have discussed this consent form with \_\_\_\_\_, who is an author of this paper.

I understand that all journals may be available in both print and on the internet, and will be available to a broader audience through marketing channels and other third parties.

Therefore, anyone can read material published in the Journal. I understand that readers may include not only medical professionals and scholarly researchers but also journalists and general members of the public.

**Patient/study participant name** \_\_\_\_\_ (please print)

**Signed by (name)** \_\_\_\_\_ (please print)

NOTE: If the patient/study participant is a minor (i.e. less than 18 years of age), or is unable to provide informed consent for publication, this must be signed by their parent or legal guardian.

NOTE: If the patient/study participant is deceased, this must be signed by their next of kin.

**Date** \_\_\_\_\_

**Signed** \_\_\_\_\_

Relationship to patient/study participant, if applicable: \_\_\_\_\_

**Author name** \_\_\_\_\_ (please print)

**Date** \_\_\_\_\_

**Signed** \_\_\_\_\_

Instructions to Authors: Please complete this form and obtain the patient’s or study participant’s signature and keep a copy on record. The manuscript reporting the patient’s or study participant’s details should state that consent for publication was obtained. You may use this template sentence as appropriate: *“Written informed consent for publication of their details was obtained from the patient/study participant/parent/guardian/next of kin”*. Please be ready to share the form with the journal editorial office if requested.
